# Supplementary material for: Unprecedented toughness in transparent, luminescent, self-healing polymers enabled via hierarchical rigid domain design
Source: Royal Society of Chemistry journal article supplement (doi:10.1039/d2mh00820c), 2022-01-01
Supplement: d2mh00820c1.pdf [file d2mh00820c1.pdf]

## Supporting information

### Unprecedented toughness in transparent, luminescent, self-healing polymers achieved via hierarchical rigid domain design

Di Zhao <sup>a</sup>, Xinzhe Zhou <sup>a</sup>, Qianrui Li <sup>a</sup>, Jing Yang <sup>b</sup> and Huanrong Li <sup>a\*</sup>

<sup>a</sup>National-Local Joint Engineering Laboratory for Energy Conservation in Chemical Process Integration and Resources Utilization, Tianjin Key Laboratory of Chemical Process Safety, School of Chemical Engineering and Technology, Hebei University of Technology, GuangRong Dao 8, Hongqiao District, Tianjin 300130, P. R. China.

<sup>b</sup>School of Materials Science and Engineering, Hebei University of Engineering, Handan 056038, Hebei province, P. R. China

Corresponding author: [lihuanrong@hebut.edu.cn](mailto:lihuanrong@hebut.edu.cn)

| Sample                      | PPG-NCO<br>(mg/mmol) | HDA<br>(mg/mmol) | TPy-NH <sub>2</sub><br>(mg/mmol) | Ln <sup>3+</sup><br>(mL/mmol) |
|-----------------------------|----------------------|------------------|----------------------------------|-------------------------------|
| HPU-TPy <sub>1</sub> -Ln    | 2300/1               | 58/0.5           | 334/1                            | 5/0.5                         |
| HPU-TPy <sub>0.75</sub> -Ln | 2300/1               | 72.5/0.625       | 250.5/0.75                       | 3.75/0.375                    |
| HPU-TPy <sub>0.5</sub> -Ln  | 2300/1               | 87/0.75          | 167/0.5                          | 2.5/0.25                      |
| HPU-TPy <sub>0.25</sub> -Ln | 2300/1               | 101.5/0.875      | 83.5/0.25                        | 1.25/0.125                    |
| HPU-TPy <sub>0</sub>        | 2300/1               | 116/1            | 0/0                              | 0/0                           |

**Table S1.** The feed ratios of various HPU-TPy<sub>n</sub>-Ln

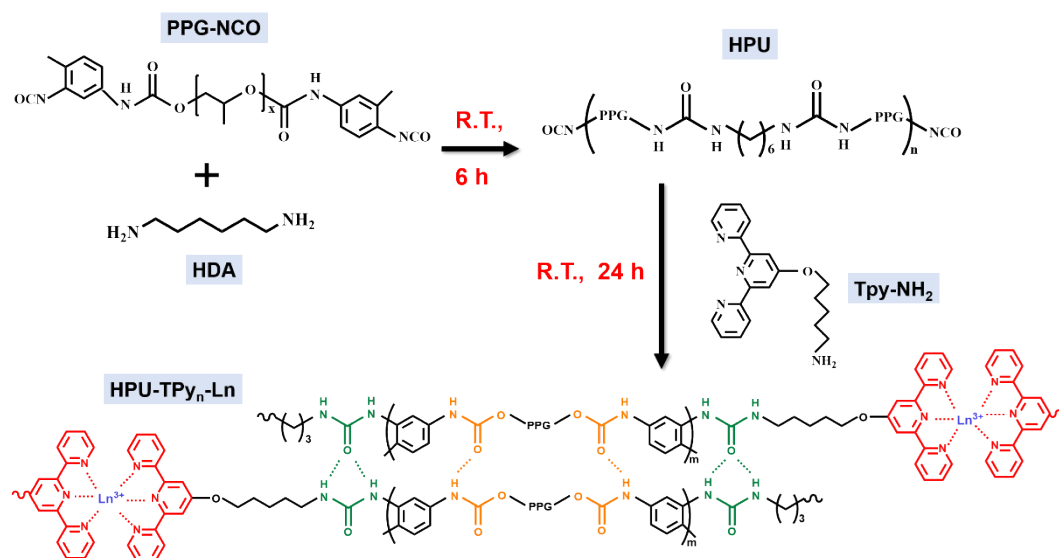

**Figure S1.** Synthetic route of HPU-TPy<sub>n</sub>-Ln.

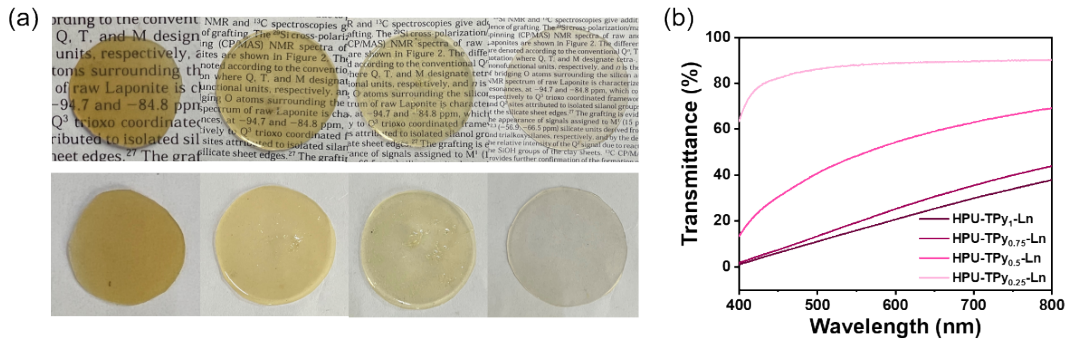

**Figure S2.** (a) Photographs of a range of materials HPU-TPy<sub>n</sub>-Ln under two different backgrounds, from left to right: n=1, 0.75, 0.5 and 0.25, respectively. (b) Transmittance spectra of HPU-TPy<sub>n</sub>-Ln films with a thickness of 0.2 mm.

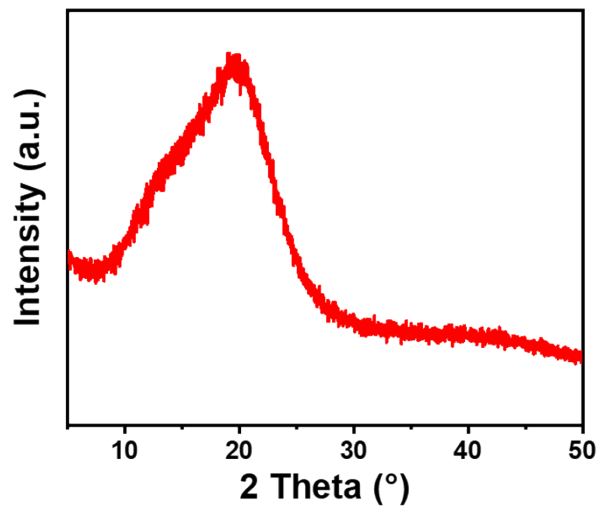

**Figure S3.** WAXD spectrum of the HPU-TPy<sub>0.25</sub>-Ln elastomers.

The wide-angle X-ray diffraction (WAXD) spectrum of the HPU-TPy<sub>0.25</sub>-Ln elastomers only show broadband absorption without sharp XRD peaks, which are the representative WAXD patterns of amorphous polymers.

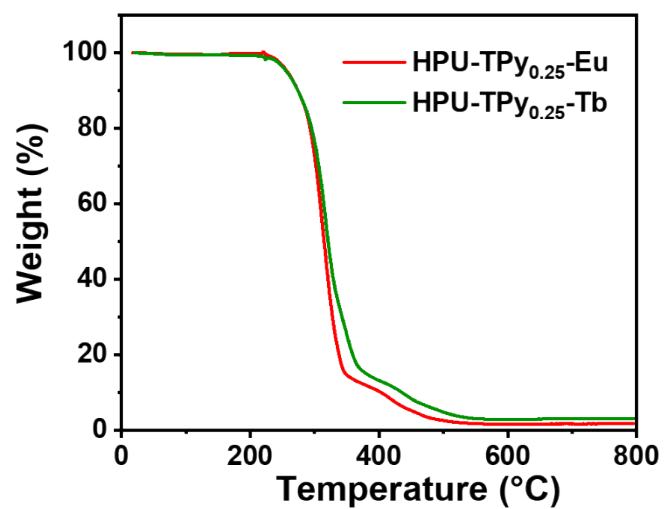

Figure S4. TG curves of HPU-TPy<sub>0.25</sub>-Ln.

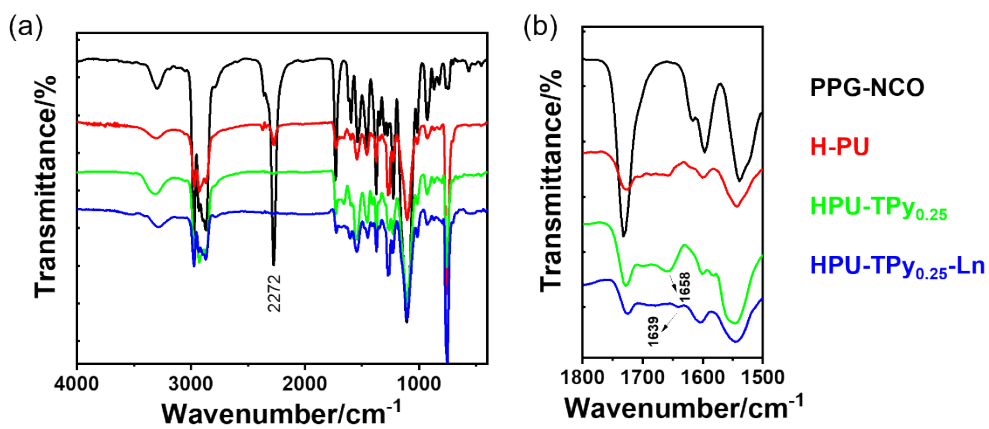

Figure S5. Infrared spectra of a series of products.

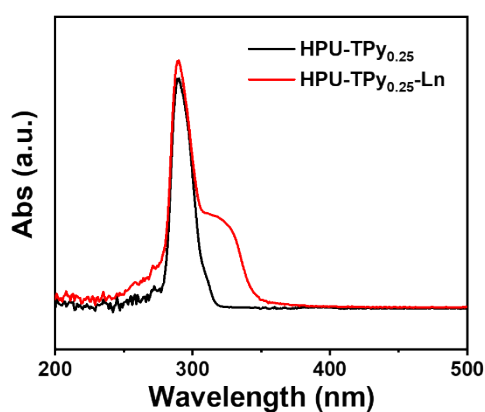

Figure S6. UV-vis spectra of HPU-TPy<sub>0.25</sub> and HPU-TPy<sub>0.25</sub>-Ln in the solution phase (CH<sub>2</sub>Cl<sub>2</sub>).

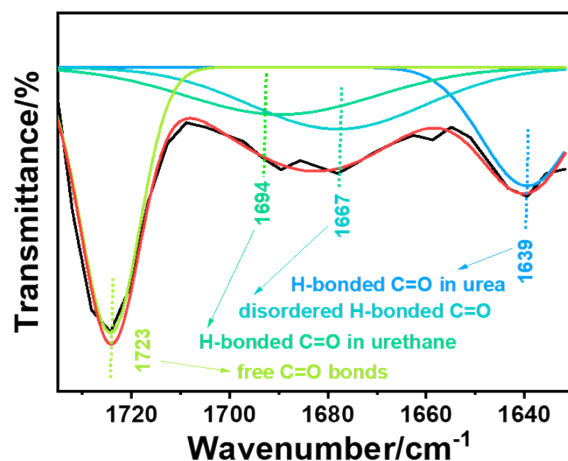

**Figure S7.** Transmittance spectra in the C=O stretching region (1631~1735  $\text{cm}^{-1}$ ) of the obtained HPU-TPy<sub>0.25</sub>-Ln material. The dashed lines are the fitted bands at 1723, 1694, 1667 and 1639  $\text{cm}^{-1}$ .

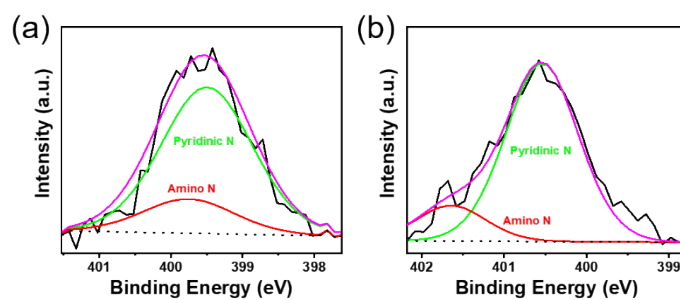

**Figure S8.** XPS spectra of (a) HPU-TPy<sub>0.25</sub> and (b) HPU-TPy<sub>0.25</sub>-Ln.

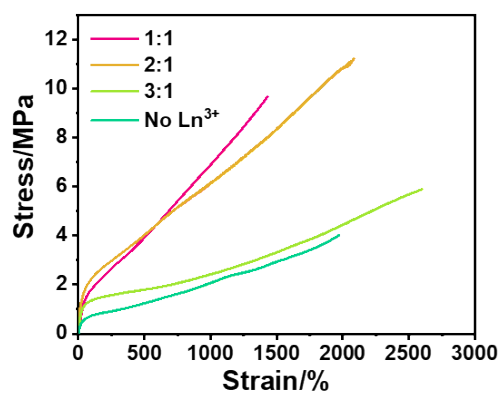

**Figure S9.** Stress-strain curves of HPU-TPy<sub>0.25</sub>-Ln with different feed molar ratios of the TPy-NH<sub>2</sub> to Ln<sup>3+</sup>.

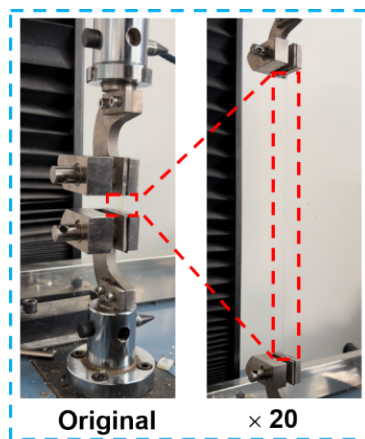

**Figure S10.** Photos of HPU-TPy<sub>0.25</sub>-Ln before and after stretching.

| Sample name                       | Strength<br>(MPa) | Toughness<br>(MJ m <sup>-3</sup> ) | Ref.      |
|-----------------------------------|-------------------|------------------------------------|-----------|
| HPU-TPy <sub>0.25</sub> -Ln       | 11.21             | 133.35                             | This work |
| Polymer-Phen-Ln <sup>3+</sup>     | 2.27              | 8.4                                | 21        |
| Polymer-Phen-Eu(tta) <sub>3</sub> | 1.59              | 9.28                               | 21        |
| Eu-Ppdc                           | 0.4               | 1.8                                | 13        |
| Ln <sup>3+</sup> -Tpy-PPG         | 0.48              | ~10                                | 22        |
| PIB-Eu-TTA                        | 0.58              | 6.27                               | 11        |
| H-PU-Ln                           | 0.58              | 1.68                               | 12        |
| P1-3                              | 0.21              | ~0.3                               | 23        |
| Eu-to-IDA                         | 6.1               | 6.4                                | 24        |
| Eu-DPA                            | 2                 | 4.4                                | 25        |
| p(HFBM-co-SBMA)                   | 1.87              | 7.26                               | 26        |
| Ln-Bipy-PDMS                      | 1.55              | ~3                                 | 27        |

**Table S2.** Comparison of mechanical properties of HPU-TPy<sub>0.25</sub>-Ln elastomer with synthetic room-temperature self-healing luminescent materials in the previous literatures.<sup>1-5</sup>

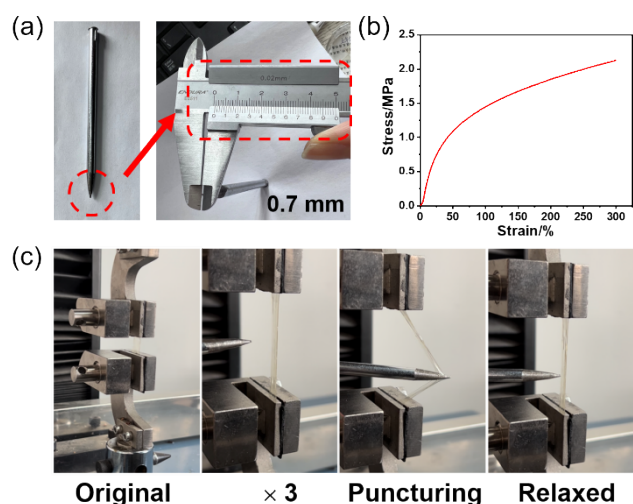

**Figure S11.** (a) A needle with a tip of 0.7mm. (b) Stress-strain curve of 300% stretching. (c) Images of puncture resistance ability of HPU-TPy<sub>0.25</sub>-Ln elastomer.

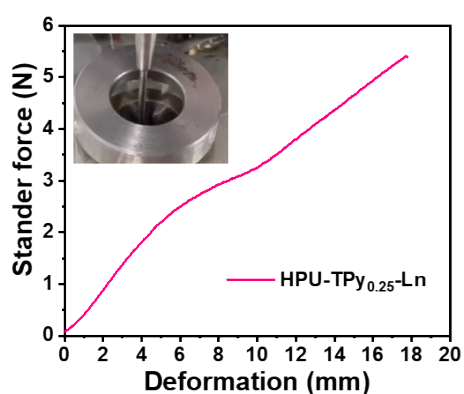

**Figure S12.** Force-displacement curves of HPU-TPy<sub>0.25</sub>-Ln, measured by the puncture resistance tests.

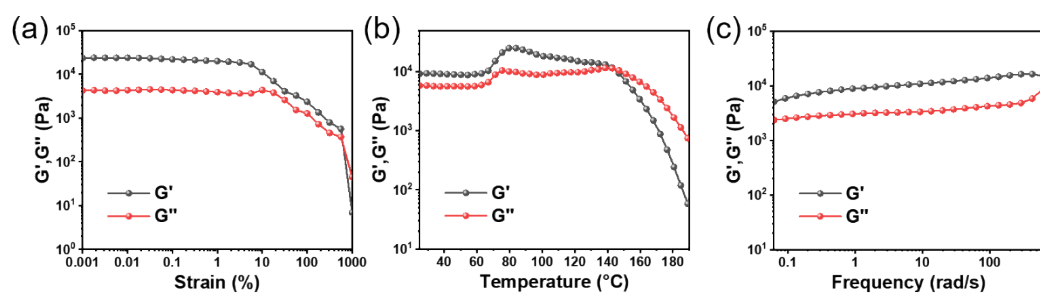

**Figure S13.** Rheological measurements of (a) strain sweep tests (b) temperature dependence and (c) frequency sweep curves of storage modulus ( $G'$ ) and loss modulus ( $G''$ ) of HPU-TPy<sub>0.25</sub>-Ln.



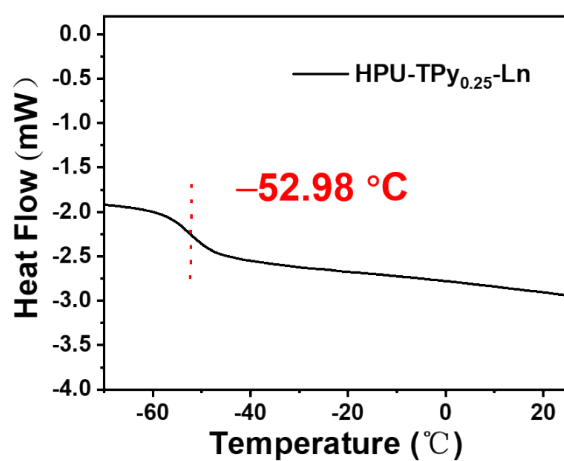

**Figure S14.** DSC curves of HPU-TPy<sub>0.25</sub>-Ln.

| Sample                      | First  | Second | Third | Fourth |
|-----------------------------|--------|--------|-------|--------|
| HPU-TPy <sub>0.25</sub> -Ln | 296.38 | 154.8  | 129.6 | 121.6  |

**Table S3.** Energy dissipation in continuous cyclic loading and unloading of HPU-TPy<sub>0.25</sub>-Ln (KJ m<sup>-3</sup>).

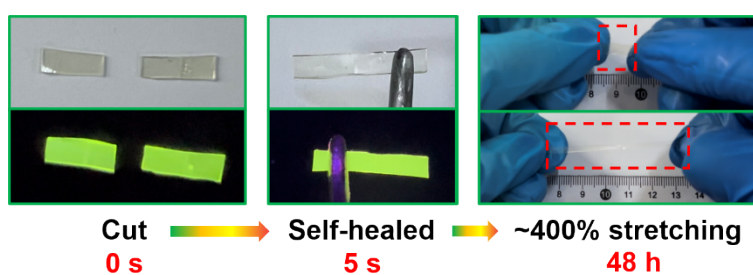

**Figure S15.** Self-healing behavior of HPU-TPy<sub>0.25</sub>-Ln.

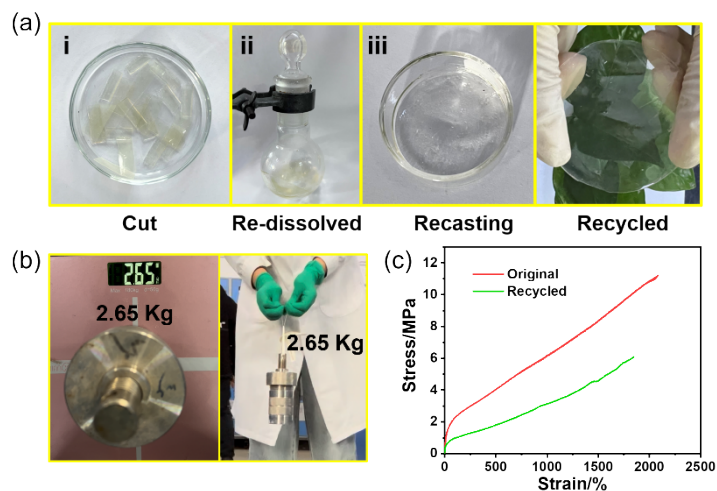

**Figure S16.** The recycling process of HPU-TPy<sub>0.25</sub>-Ln films. (b) 2.65 kg weight lifted by a recycled HPU-TPy<sub>0.25</sub>-Ln elastomer strip (weight: 38.1 mg, 40 mm (L) × 7 mm (W) × 0.15 mm (T)). (c) Stress-strain curves of original and recycled HPU-TPy<sub>0.25</sub>-Ln.

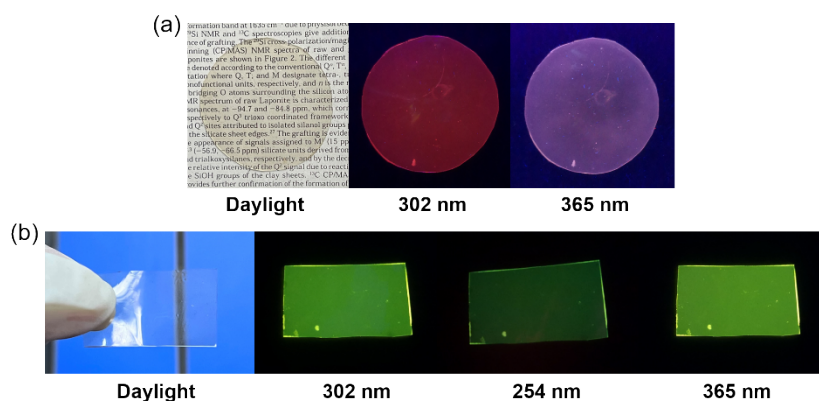

**Figure S17.** Photographs of (a) HPU-TPy<sub>0.25</sub>-Eu and (b) HPU-TPy<sub>0.25</sub>-Tb under daylight and UV light.

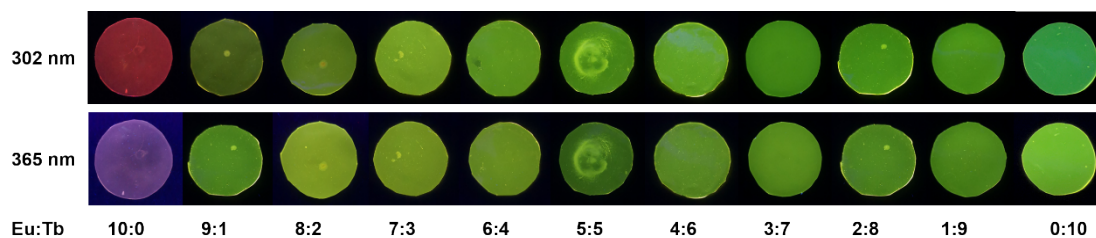

**Figure S18.** Photographs of HPU-TPy<sub>0.25</sub>-Eu<sub>x</sub>Tb<sub>y</sub> under UV light.

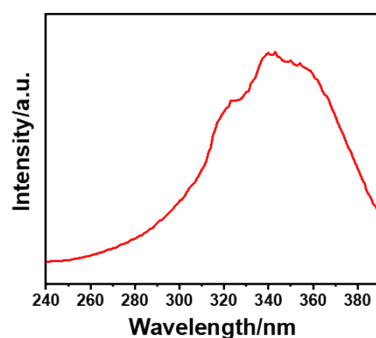

**Figure S19.** (a) The excitation curves of HPU-TPy<sub>0.25</sub> monitored at 544 nm.

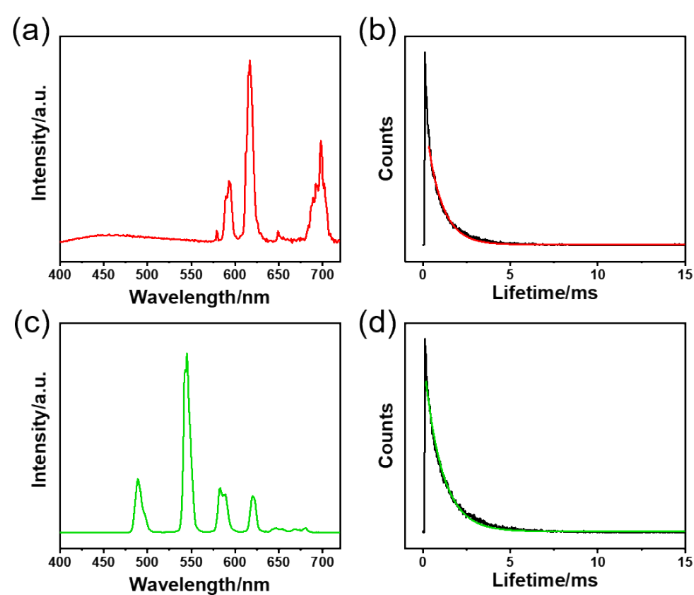

**Figure S20.** The emission spectra of (a) HPU-TPy<sub>0.25</sub>-Eu and (c) HPU-TPy<sub>0.25</sub>-Tb excited at 340 nm. The luminescence decay curves of (b) HPU-TPy<sub>0.25</sub>-Eu and (d) HPU-TPy<sub>0.25</sub>-Tb.

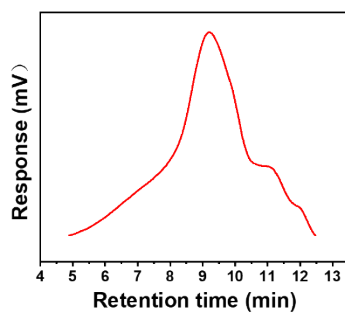

**Figure S21.** GPC curve of HPU-TPy<sub>0.25</sub>.
